# Supplementary material for: Interference with Activator Protein-2 transcription factors leads to induction of apoptosis and an increase in chemo- and radiation-sensitivity in breast cancer cells
Source: BMC Cancer. 2010 May 11;10:192. doi: 10.1186/1471-2407-10-192 (PMC2890516; doi:10.1186/1471-2407-10-192)
Supplement: Additional file 2 — Table S2: Gene/Gene Set overlap matrix derived by using the datasets deposited in the Molecular Signatures Database. Row (A) and (B) presents the results of 72 genes identified in the screen here in relation to list all the datasets relevant to the analysis (C-V). The spreadsheet (Overlapgenset) identifies the abbreviations used in (C-V). Red boxes indicate overexpression, green boxes indicate downregulation (Yellow - no information deposited). [file 1471-2407-10-192-S2.XLS]

## Sheet: Foglio1
Gene/Gene Set Overlap Matix
		VERHAAK_AML_NPM1_MUT_VS_WT	CIS_XPC_UP	LEE_TCELLS2_UP	HALMOS_CEBP_DN	GN_CAMP_GRANULOSA_UP	CMV-UV_HCMV_6HRS_UP	PEART_HISTONE_UP	FSH_OVARY_MCV152_UP	ET743_SARCOMA_72HRS_DN	LEE_MYC_E2F1_DN	LEE_ACOX1_DN	TNFA_NFKB_DEP_UP	ALCALAY_AML_NPMC_UP	HDACI_COLON_CLUSTER9	YAO_P4_KO_VS_WT_DN	CHIARETTI_T_ALL	FSH_GRANULOSA_UP	LH_GRANULOSA_UP	ZHAN_PCS_MULTIPLE_MYELOMA_SPKD	UVB_NHEK3_ALL
Gene Symbol	Description
HIST1H1C	histone cluster 1, H1c
THBS1	thrombospondin 1
GCH1	GTP cyclohydrolase 1 (dopa-responsive dystonia)
TNFAIP3	tumor necrosis factor, alpha-induced protein 3
MEIS1	Meis1, myeloid ecotropic viral integration site 1 homolog (mouse)
JAG1	jagged 1 (Alagille syndrome)
HIST1H2BC	histone cluster 1, H2bc
HIST1H3D	histone cluster 1, H3d
SEMA3B	sema domain, immunoglobulin domain (Ig), short basic domain, secreted, (semaphorin) 3B
SLC43A3	solute carrier family 43, member 3
FXYD3	FXYD domain containing ion transport regulator 3
MAL	mal, T-cell differentiation protein
EGR3	early growth response 3
ANLN	anillin, actin binding protein
ABCD3	ATP-binding cassette, sub-family D (ALD), member 3
MBP	myelin basic protein
BTBD3	BTB (POZ) domain containing 3
PSCDBP	pleckstrin homology, Sec7 and coiled-coil domains, binding protein
ANTXR2	anthrax toxin receptor 2
SNX9	sorting nexin 9
PDCD8	programmed cell death 8 (apoptosis-inducing factor)
FXYD5	FXYD domain containing ion transport regulator 5
CTGF	connective tissue growth factor
TFAP2C	transcription factor AP-2 gamma (activating enhancer binding protein 2 gamma)
COL15A1	collagen, type XV, alpha 1
HSD11B1	hydroxysteroid (11-beta) dehydrogenase 1
INSIG1	insulin induced gene 1
CETN2	centrin, EF-hand protein, 2
HIST1H2BJ	histone cluster 1, H2bj
NT5C2	5'-nucleotidase, cytosolic II
PPP2R5E	protein phosphatase 2, regulatory subunit B (B56), epsilon isoform
SFTPD	surfactant, pulmonary-associated protein D
GSTA3	glutathione S-transferase A3
UNC13B	unc-13 homolog B (C. elegans)
FST	follistatin
SNF1LK	SNF1-like kinase
HIST1H2BL	histone cluster 1, H2bl
RASA1	RAS p21 protein activator (GTPase activating protein) 1
LAMA3	laminin, alpha 3
DDX6	DEAD (Asp-Glu-Ala-Asp) box polypeptide 6
SLCO2A1	solute carrier organic anion transporter family, member 2A1
PRSS12	protease, serine, 12 (neurotrypsin, motopsin)
MRVI1	murine retrovirus integration site 1 homolog
ZMYND11	zinc finger, MYND domain containing 11
MPV17	MpV17 mitochondrial inner membrane protein
MSLN	mesothelin
HEBP2	heme binding protein 2
HIST1H3E	histone cluster 1, H3e
AHCYL1	S-adenosylhomocysteine hydrolase-like 1
ASB1	ankyrin repeat and SOCS box-containing 1
TRIM46	tripartite motif-containing 46
PPP3CC	protein phosphatase 3 (formerly 2B), catalytic subunit, gamma isoform (calcineurin A gamma)
ELMO1	engulfment and cell motility 1
SCLY	selenocysteine lyase
PCYT1A	phosphate cytidylyltransferase 1, choline, alpha
FBXW7	F-box and WD-40 domain protein 7 (archipelago homolog, Drosophila)
ABCB9	ATP-binding cassette, sub-family B (MDR/TAP), member 9
BMPER	BMP binding endothelial regulator
PAPLN	papilin, proteoglycan-like sulfated glycoprotein
ATP6V1B1	ATPase, H+ transporting, lysosomal 56/58kDa, V1 subunit B1 (Renal tubular acidosis with deafness)
HIST1H2BM	histone cluster 1, H2bm
HIST1H3I	histone cluster 1, H3i
INSL6	insulin-like 6
MMP24	matrix metallopeptidase 24 (membrane-inserted)
PERQ1	PERQ amino acid rich, with GYF domain 1
PPM1L	protein phosphatase 1 (formerly 2C)-like
REM2	RAS (RAD and GEM) like GTP binding 2
SLC25A30	solute carrier family 25, member 30
SLMAP	sarcolemma associated protein
	Red: UP
	Green: DOWN
	Yellow: not specified (UP or DOWN)

## Sheet: overlapgeneset
Overlap Results
Collection(s):	CGP
# overlaps shown:	20
# genesets in collections:	1186
# genes in comparison (n):	69
# genes in collections (N):	16271
geneset name	# genes in geneset (K)	description	# genes in overlap (k)	k/K	p value
VERHAAK_AML_NPM1_MUT_VS_WT_UP	189	Genes that are upregulated in AML NPM1 mutant versus AML NPM1 wild type	8	0.0423	1.21e-06
CIS_XPC_UP	151	Increased expression in XPC-defective fibroblasts, compared to normal fibroblasts, following treatment with cisplatin	5	0.0331	0.000406
LEE_TCELLS2_UP	1141	Transcripts enriched in more mature cells (SP4, CB4, and AB4) more than 3-fold, with average signal value differences of at least 100 between less mature (ITTP, DP) and more mature (SP4, CB4, and AB4) cells	13	0.0114	0.000637
HALMOS_CEBP_DN	46	The list of most highly downregulated genes after conditional expression of C/EBPalpha	3	0.0652	0.00093
GN_CAMP_GRANULOSA_UP	53	Up-regulated in human granulosa cells by the gonadotropins LH and FSH, as well as by cAMP-stimulator forskolin	3	0.0566	0.00139
CMV-UV_HCMV_6HRS_UP	121	Up-regulated in fibroblasts at 6 hours following infection with UV-inactivated human cytomegalovirus	4	0.0331	0.00157
PEART_HISTONE_UP	59	Cell-proliferation-related genes upregulated by SAHA and depsipeptide (histone deacetylase inhibitors)	3	0.0508	0.00189
FSH_OVARY_MCV152_UP	61	Up-regulated in ovarian epithelial cells (MCV152) 72 hours following FSH treatment, compared to untreated	3	0.0492	0.00207
ET743_SARCOMA_72HRS_DN	222	Down-regulated at48 hours following treatment with Et-743 in at least 6 of 8 sarcoma cell lines	5	0.0225	0.00215
LEE_MYC_E2F1_DN	64	Genes down-regulated in hepatoma tissue of Myc+E2f1 transgenic mice	3	0.0469	0.00237
LEE_ACOX1_DN	65	Genes down-regulated in hepatoma tissue in Acox1 KO mice	3	0.0462	0.00248
TNFA_NFKB_DEP_UP	18	Up-regulated at any timepoint following TNFa treatment, only with functional NFkB	2	0.1111	0.00254
ALCALAY_AML_NPMC_UP	139	Increased expression in NPMc+ leukemias	4	0.0288	0.00256
HDACI_COLON_CLUSTER9	67	Regulated by TSA, butyrate and/or curcumin in SW260 colon carcinoma cells (Cluster 9, associated with histone hyperAc)	3	0.0448	0.00269
YAO_P4_KO_VS_WT_DN	21	Genes that have at least a 15 fold increase in expression in the WT compared to KO at 6 hours after P4 injection in ovariectomized mice by paired SAM and/or t-test	2	0.0952	0.00344
CHIARETTI_T_ALL	259	Genes overexpressed in leukemia cells.	5	0.0193	0.00403
FSH_GRANULOSA_UP	78	Up-regulated in human granulosa cells stimulated with follicle stimulation hormone (FSH)	3	0.0385	0.00409
LH_GRANULOSA_UP	80	Up-regulated in human granulosa cells stimulated with luteinizing hormone (LH)	3	0.0375	0.00438
ZHAN_PCS_MULTIPLE_MYELOMA_SPKD	25	Genes with spiked expression in subsets of MM PCs from newly diagnosed patients	2	0.08	0.00484
UVB_NHEK3_ALL	397	Regulated by UV-B light in normal human epidermal keratinocytes	6	0.0151	0.00525
